# Supplementary material
Source: Springer Nature journal article supplement (https://www.springermedizin.de/resource/supplementary/12879_2010_1555_MOESM5_ESM.pdf/9442800)
Supplement: MOESM5 [file 9442800]

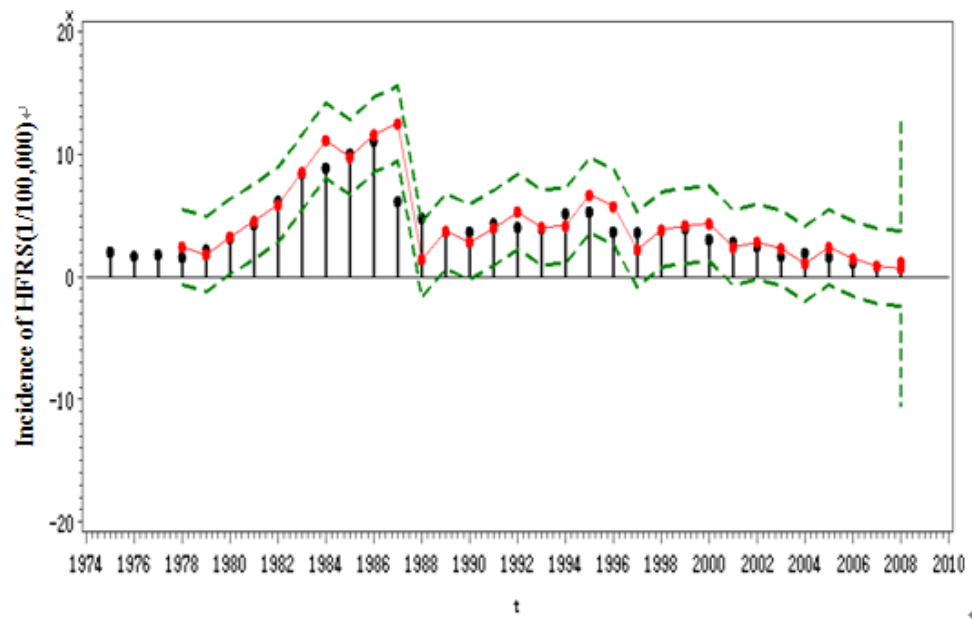

**Figure 5** Black dots: observed values of HFERS incidence of China, for the period 1975-2008. Red solid line: ARIMA(0,3,1) model's fitted curve(1978-2008). Red dots: ARIMA(0,3,1) model's fitted values (1978-2008). Dashed lines: 95% confidence intervals of predicated values.
